# Supplementary material
Source: Springer Nature journal article supplement (https://www.springermedizin.de/resource/supplementary/13031_2011_83_MOESM1_ESM.pdf/9645066)

Proportion of measles cases

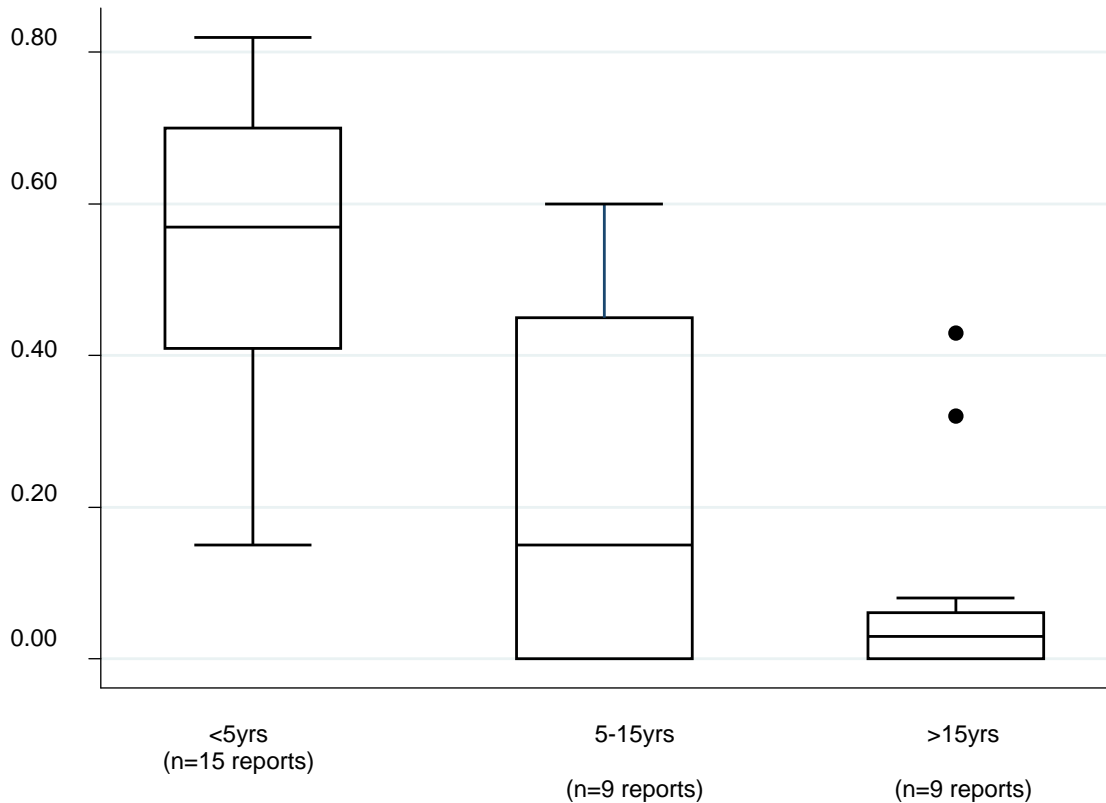

Supplement: MOESM1 [file 9645066]
